# Supplementary material
Source: Springer Nature journal article supplement (https://www.springermedizin.de/resource/supplementary/12888_2008_514_MOESM3_ESM.pdf/9483474)

Suicide attempts (lifetime prevalence) in men and women

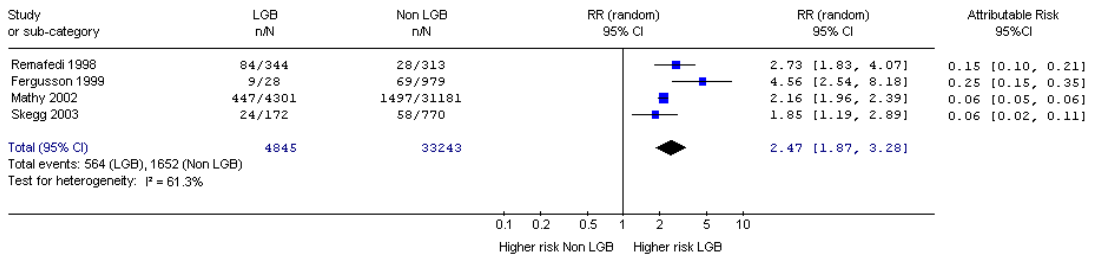

Suicide attempts (lifetime prevalence) in men only

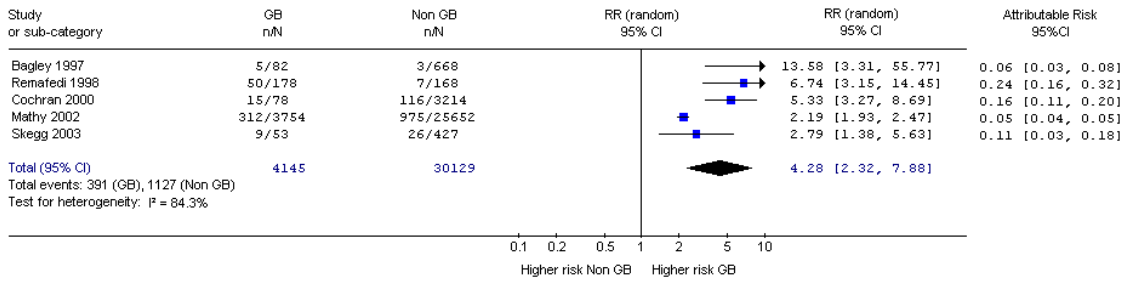

Suicide attempts (lifetime prevalence) in women only

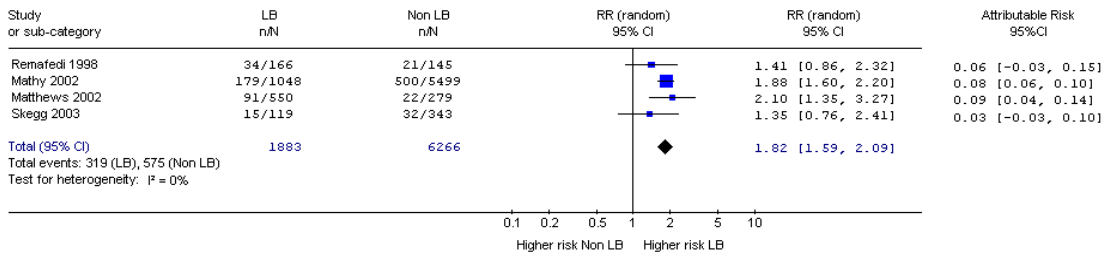

Suicide attempts (12 month prevalence) in men and women

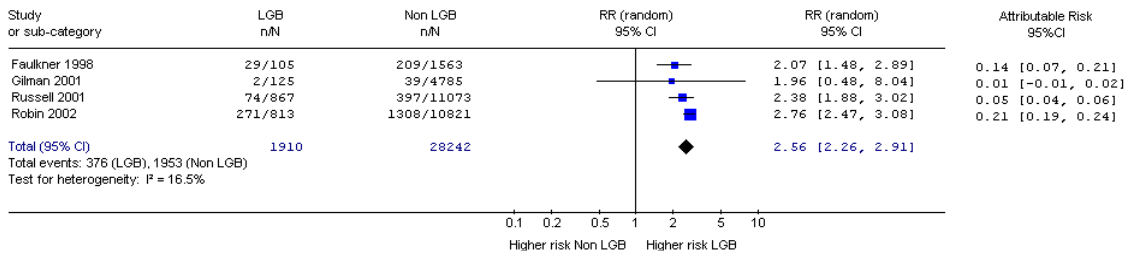

Suicide attempts (12 month prevalence) in men only

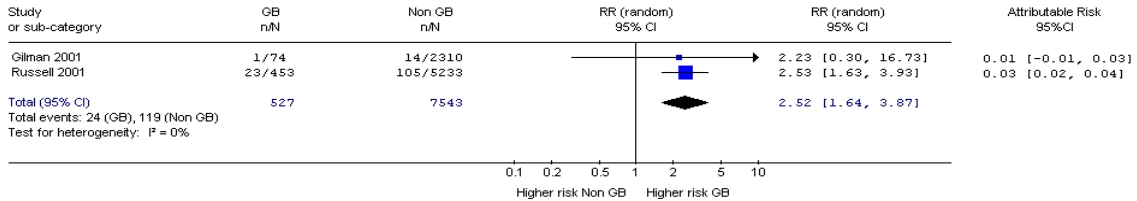

Suicide attempts (12 month prevalence) in women only

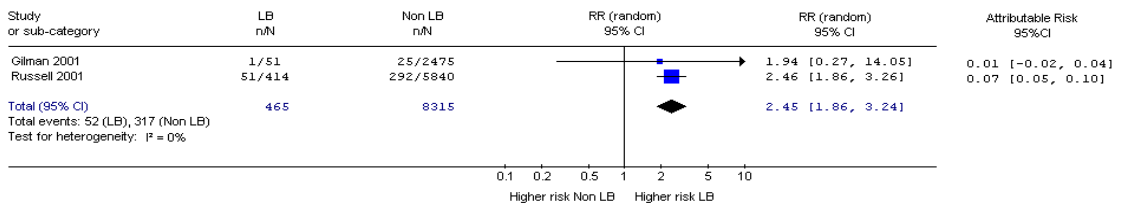

Supplement: MOESM3 [file 9483474]
